# Supplementary material
Source: PubMed Central journal article supplement (PMC2670796)
Supplement: blood-2008-07-167189_1.pdf [file blood-2008-07-167189_1.pdf]

| <b>Gene</b>            | <b>Forward primer</b>    | <b>Reverse primer</b>     |
|------------------------|--------------------------|---------------------------|
| <b>mouse ICSBP1</b>    | TGACACCAACCAGTTCATCCGAGA | TGCTCTACCTGCACCAGAATGAGT  |
| <b>mouse CCL6</b>      | CCAAGACTGCCATTTCAATC     | AAGCAATGACCTTGTTCCCA      |
| <b>mouse CCL9</b>      | GAAGGCACAGCAAGGGCTTGAAAT | GTTTGTAGGTCCGTGGTGTGAGT   |
| <b>Human ICSBP1</b>    | CCAGATTTTGAGGAAGTGACGGAC | TGGGAGAATGCTGAATGGTGC     |
| <b>Human CCL15</b>     | TGCCTCATGCTTGTTGCTGTCCTT | ATATGACACCTGGCTTGGAGCACT  |
| <b>Human CCL23</b>     | ATGAAGGTCTCCGTGGCTGC     | GGAAGCTTTGACATCATGAACTCTG |
| <b>mouse CXCR4</b>     | TGCTCTCGAAGTCACATCCTTGCT | ACAGGTACATCTGTGACCGCCTTT  |
| <b>mouse PR3</b>       | TGACGTGCTTCTCCTCCAGCTAAA | TTGTGTTCCCGGCATAGGAAGGT   |
| <b>mouse MPO</b>       | CTGTGGCCAAGGCCTTTCAATGTT | AAGGGCATGGAGACACCATCTTCA  |
| <b>mouse CAT S</b>     | TCAGAACCTGGTGGACTGCTCAAA | TGCCATCAAGAGTCCCATAGCCAA  |
| <b>mouse CAT G</b>     | AGCCATCCGCCATCCTGATTACAA | TTTCTCTCGGGTTTCCCACACAGA  |
| <b>mouse Cyclin D1</b> | TCCCCTTGACTGCCGAGAAGTTGT | TACCATGGAGGGTGGGTTGAAAT   |
| <b>mouse Cyclin D2</b> | ATCTGTGGGCTTCAGCAGGATGAT | TTGGTCCGGATCTTCCACAGACTT  |
| <b>mouse BAD</b>       | AGCAGCCCAGAGTATGTTCCAGAT | TAAGCTCCTCCTCCATCCCTTCAT  |
| <b>mouse PF4</b>       | CTGCTTCTGGGCCTGTTGTTTCT  | TCCCATTCTTCAGGGTGGCTATGA  |
| <b>mouse NFkB</b>      | ACCAGACTGGCAGCTCTTCTCAAA | TCGTGTCTTCTGTCAGCTGCTTCA  |
| <b>mouse CAT Z</b>     | ACAGCTACAACCTTGCCATCGAGA | GGTCCCAGTGCAGTTGTGTTTCAT  |
| <b>mouse NE</b>        | ATGGCTTTGACCCATCACAACTGC | ACCAGAGTGCATACGTTACACGA   |
| <b>mouse WT-1</b>      | CAGAGAGCAAGGCACCAG       | TAAGAGCCCAGTGCTAGTG       |
| <b>mouse N-ras</b>     | TACAAACTGGTGGTGGTTGGAGCA | AATACACAGAGGAACCCTTCGCCT  |
| <b>mouse Lysozyme</b>  | TGTGTTTAGCTCAGCACGAGAGCA | TCTCTCACCACCCTCTTTGCACAT  |
